# Supplementary material for: Synthesis of highly luminescent cobalt(ii)-bis(8-hydroxyquinoline) nanosheets as isomeric aromatic amine probes
Source: Royal Society of Chemistry journal article supplement (doi:10.1039/b9nr00019d), 2009-01-01
Supplement: b9nr00019d.pdf [file b9nr00019d.pdf]

# **Synthesis of Highly Luminescent Cobalt ( II ) - Bis (8-hydroxyquinoline) Nanosheets as Isomeric Aromatic Amines Probes**

**Haibing Li,\* and Yuling Li**

Key Laboratory of Pesticide & Chemical Biology (CCNU), Ministry of Education; College of Chemistry, Central China Normal University, Wuhan 430079, PR China

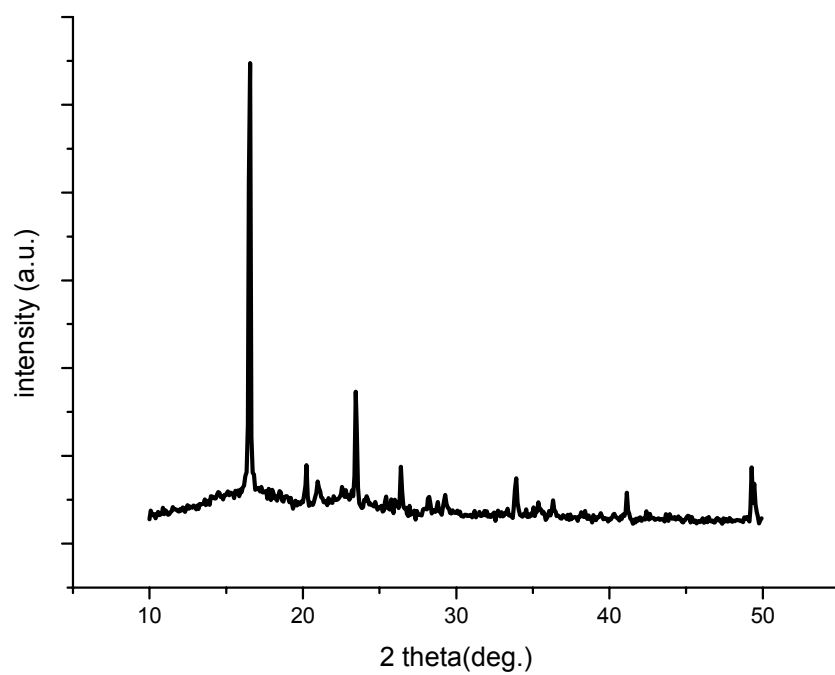

Figure S1 . XRD pattern of the CoQ<sub>2</sub> nanosheets.

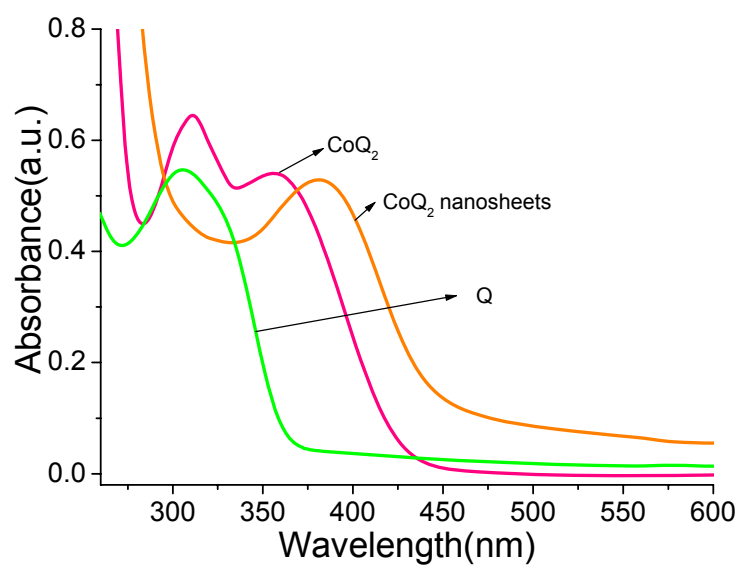

Figure S2. the UV-Vis absorption spectra of 8-hydroxyquinoline(Q), CoQ<sub>2</sub> and CoQ<sub>2</sub> nanosheets.

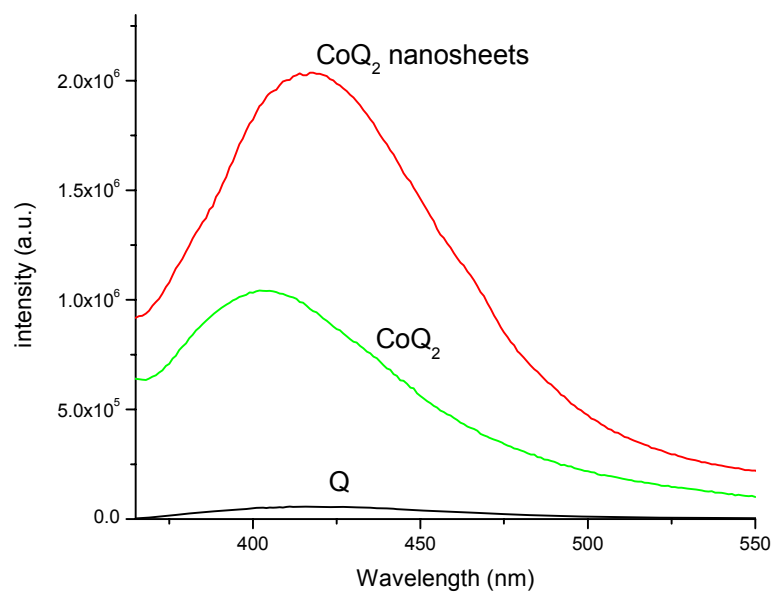

Figure S3 . the fluorescence spectra of ligand Q, CoQ<sub>2</sub> and CoQ<sub>2</sub> nanosheets.
